# Supplementary material
Source: PubMed Central journal article supplement (PMC4268878)
Supplement: NIHMS626329-supplement-1.pdf [file NIHMS626329-supplement-1.pdf]

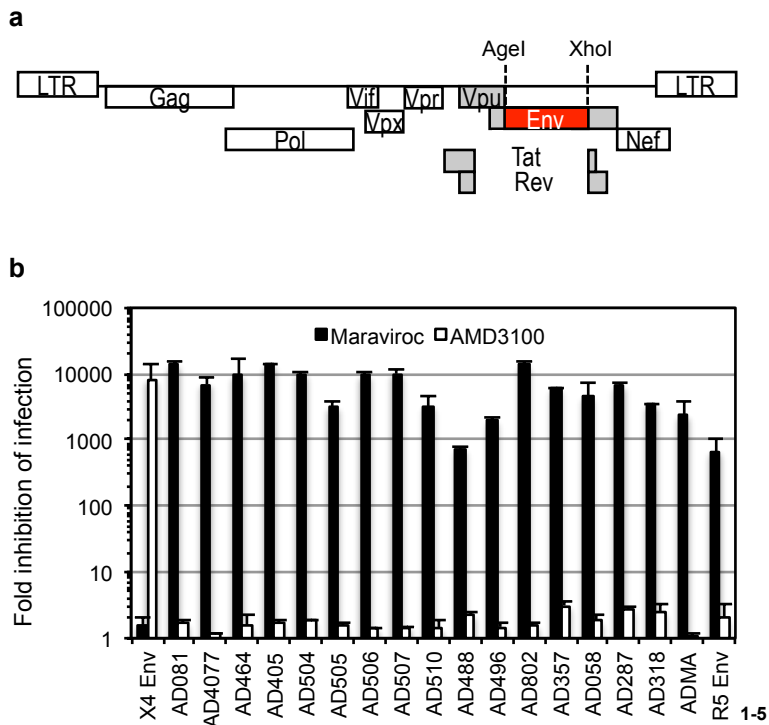

**Figure S1. Viral plasmids and *in vitro* tropism of R5-SHIVs.** (Related to Figure 1)

**a.** Schematic representation of the full length SHIV plasmid. White boxes represent SIV<sub>MAC239</sub>-derived sequences, grey SHIV<sub>KB9</sub>-derived sequences and red Group 1 or Group 2 Env-derived sequences. **b.** Fold inhibition of infectivity of SHIVs expressing the Env protein indicated on TZM-bl cells in the presence of Maraviroc (8 $\mu$ M) or AMD3100 (1 $\mu$ M) relative to no inhibitor. Control envelope proteins were from HIV-1<sub>NL4-3</sub> Env (X4 Env) and HIV-1<sub>AD8</sub> (R5 Env). The mean fold-inhibition and S.D. of two independent experiments is plotted.

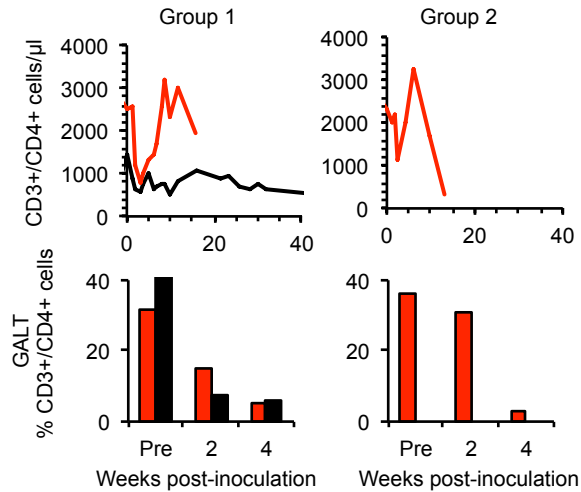

**Figure S2. CD4+ T-cell depletion in animals inoculated with R5-SHIV cocktails.** (Related to Figure 2)

Absolute numbers of CD4+, CD3+ cells in blood and % of CD3+ cells that were CD4+ in the GALT in animals inoculated with cocktails of Group 1 or Group 2 viruses were determined by flow cytometry. Corresponding viral loads are shown in Fig. 2a,b.

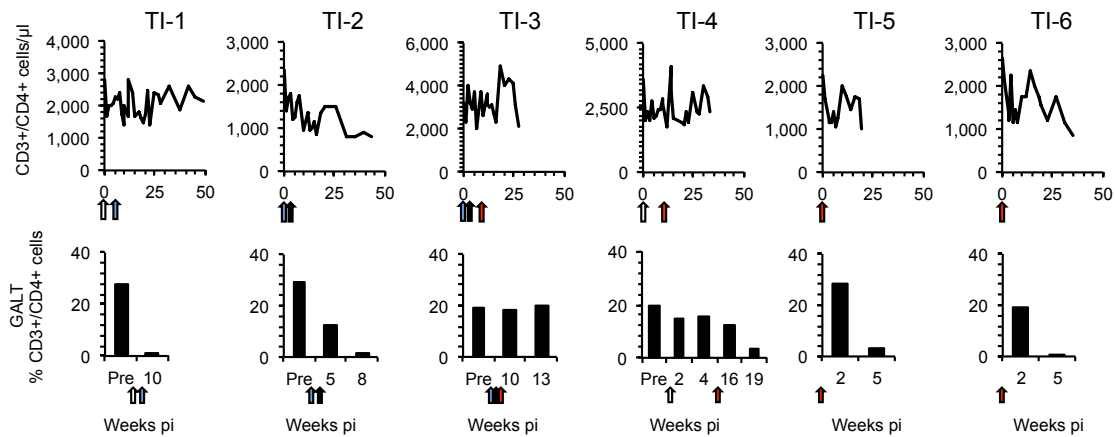

**Figure S3. Mucosal challenges with increasing doses of SHIV<sub>1054</sub>.** (Related to Figure 3c)

Six animals were inoculated intrarectally with increasing SHIV<sub>1054</sub> doses. Absolute numbers of CD3/CD4+ cells in blood and percentage of CD3+ cells that were CD4+ in the GALT for each animal are shown. 'Pre' indicates samples obtained three weeks prior to the first virus challenge in each animal. Arrows indicate time and dose of viral challenge: white arrow is 3x10<sup>3</sup> i.u., blue arrow is 3x10<sup>4</sup> i.u., black arrow is 7.4x10<sup>4</sup> i.u. and red arrow is 2.1x10<sup>5</sup> i.u.. Corresponding viral loads are shown in Fig. 3c.



**Figure S4. HIV-1 monoclonal antibody protects against T/F Env virus challenge.**

(Related to Figure 4)

**a.** Neutralization of SHIV<sub>1064</sub> by anti-HIV-1 Env monoclonal antibody PGT121 and control (DEN3) antibody assayed in TZM-bl cells. Dotted line marks IC90. **b.** Neutralization titers of plasma samples obtained at the indicated days after antibody administration and given as reciprocal dilution at which 50% reduction of virus infectivity was achieved. Day 0 is the day of virus inoculation. Average of two independent experiments. **c.** PBMC cell-associated viral RNA and DNA copies sampled at the time of the plasma viral 'blip', week 3 p.i. for animals #1, 2 and 3 and week 4 p.i. for animals #4, 5 and 6 in both control and PGT-121 groups. **d.** Immunoblots performed using purified SHIV<sub>1054</sub> virions as the antigen, probed with plasma samples recovered from the indicated animals at 8 weeks prior to and 8 weeks after intrarectal challenge with SHIV<sub>1054</sub>.

**Table S1. Group 1 Env sequence origin and Genebank accession numbers.**

(Related to Figure 1)

| Env name      | original clone name | Accession # |
|---------------|---------------------|-------------|
| <b>1054</b>   | 1054.TC4.1499       | EU289185    |
| <b>AD17</b>   | AD17_3C_A9          | GU331244    |
| <b>SC31</b>   | SC31 4E11A          | EU576909    |
| <b>BORI2F</b> | BORId9_2F8          | EU576282    |
| <b>TT29</b>   | TT29P 3A1           | EU577190    |
| <b>BORI4D</b> | BORId9_4D7          | EU576296    |
| <b>TT31</b>   | TT31P_2F10          | EU577213    |
| <b>9015</b>   | 9015.07_A1          | EU575795    |
| <b>62615</b>  | 62615.03_p4         | EU575611    |
| <b>1051C</b>  | 1051.12_C22         | EU575148    |
| <b>1051TD</b> | 1051.12_TD12        | EU575170    |
| <b>1006</b>   | 1006_11.C3.1601     | EU289183    |
| <b>62357</b>  | 62357_14.D3.4589    | EU289189    |
| <b>6244</b>   | 6244_13.B5.4576     | EU289191    |
| <b>63358</b>  | 63358.p3.4013       | EU289192    |
| <b>CH040</b>  | 700010040.C9.4520   | EU289193    |
| <b>9014</b>   | 9014_01.TB1.4769    | EU289195    |
| <b>SC45</b>   | SC45_45B            | EU289201    |
| <b>PRB926</b> | PRB926_04.A9.4237   | EU289197    |
| <b>SC05</b>   | SC05.8C11.2344      | EU289201    |
| <b>ADMA</b>   | ADMAG9b             | KJ372191    |

**Table S2. Neutralization of R5-SHIVs by reference plasmas, sCD4 and broadly neutralizing antibodies (TZM-bl system).**

(Related to Experimental Procedures)

Neutralization sensitivity of R5-SHIVs given as reciprocal dilution for reference plasmas and sCD4 or antibody concentration ( $\mu\text{g/ml}$ ) at which 50% reduction of virus infectivity was achieved.

**Table S3. Plasma and serum viral loads in antibody-infused animals.**

(Related to Figure 4)

| animal # | control   |           | PGT121    |          |
|----------|-----------|-----------|-----------|----------|
|          | Plasma VL | Serum VL  | Plasma VL | Serum VL |
| 1        | 28,000    | 59,000    | 30        | <30      |
| 2        | 260,000   | 200,000   | 190       | <30      |
| 3        | 2,800     | 24,000    | 50        | <30      |
| 4        | 1,900,000 | 1,800,000 | 40        | <30      |
| 5        | 810,000   | 1,000,000 | 60        | <30      |
| 6        | 3,000,000 | 2,400,000 | <30       | <30      |

Viral RNA copies/ml in plasma and serum obtained from animals infused with control (for comparison) or PGT121 antibodies. Samples were obtained from both groups of animals at the time of the 'blips' in PGT121 infused animals, 4 weeks post-inoculation for animals 1,2 and 3 and 3 weeks post-inoculation for animals 4, 5 and 6. 30 RNA copies/ml is the limit of detection for this assay.

**SUPPLEMENTAL EXPERIMENTAL PROCEDURES**

**Cloning strategy**

HIV-1 Env-coding sequences were amplified using degenerate PCR primers that introduced restriction enzyme sites (forward: 5'-TTATGGGGTACCGGTRTGAARGAAGCAACCACCAC-3' and reverse: 5'-GGACCCCTCGAGGYTGGGARGYGGGTCTGNCCYGAYAATGG-3') directly from

plasmids encoding the 3' half of Group 1 T/F viruses. For Group 2 viruses nested PCR was done using DNA extracted from patient PBMC samples (first round primers: forward: 5'-TAGAGCCCTGGAAGCATCCAGGAAG-3' and reverse: 5'-TTGCTACTTGTGATTGCTCCATGT-3'). The unique 5' restriction site, AgeI, was positioned immediately 3' to the sequence encoding the HIV-1 Env leader peptide and the 3' restriction site, XhoI, was positioned within the coding sequence of the HIV-1 gp41 cytoplasmic tail, proximal to the 5' end of sequences encoding the second exon of Tat and Rev (Figure S1a). Following introduction of the HIV-1 Env sequences into the 3' half SHIV plasmid, a semi-automated procedure was employed to introduce a large number of 3' half SHIV sequences into the plasmid expressing the 5' half SHIV sequences and then screened for infectious clones (outlined in Figure 1a). Specifically, bacterial colonies resulting from the ligation of the HIV-1 Env amplicons into the 3' half SHIV plasmid were pooled, plasmid DNA was extracted, digested and introduced into the plasmid containing the 5' half SHIV genome. Individual colonies resulting from this second ligation/transformation, containing the full-length SHIV genome, were picked and DNA extracted using an epMotion 5057 robot (Eppendorf) and Qiaprep 96 Turbo kit (Qiagen). Subsequently full-length SHIV clones were screened by transfection using PEI (Polyscience, Inc.) in 293T cells seeded in 96-well plates. Infectivity of all full-length viral clones was assayed on indicator TZM-bl cells, obtained from the NIH AIDS Research and Reference Reagent Program, as contributed by John Kappes and Xiaoyun Wu. Following selection of SHIV clones for further study, larger viral stocks for animal inoculations were produced by transfection of full-length SHIV clones in 293T cells.

### **Animal experiments**

At the start of the study, all animals were free of cercopithicine herpesvirus 1, simian immunodeficiency virus (SIV), simian type-D retrovirus, and simian T-lymphotropic virus

type 1. Animals with Mamu alleles B08 and B17 were excluded from these studies. Plasma for viral RNA (vRNA) quantification, sequencing analysis, and immunoblots, and peripheral blood mononuclear cells (PBMCs) for flow cytometry assays were isolated from whole blood collected in EDTA-anticoagulated Vacutainer tubes (BD) at the time points indicated. Plasma was separated from the blood by centrifugation and was frozen at -80 °C in aliquots before analysis for the presence of vRNA or antibodies. PBMCs were isolated by Ficoll-Paque Plus (GE Healthcare) gradient centrifugation; serum was prepared from serum collection tubes.

### **Single-genome amplification/sequencing of SHIV *env***

A 3.5kb fragment that includes the entire *env* gene was amplified from the inoculum stock and each macaque at peak viremia. A limiting dilution, single-genome amplification PCR approach was used so that only one amplifiable molecule was present in each reaction. Reverse transcription of RNA to single-stranded cDNA was performed using SuperScript III reverse transcriptase according to manufacturer's recommendations (Invitrogen) and a gene specific primer: SIVEnvR1 5'-TGT AAT AAA TCC CTT CCA GTC CCC CC-3'. The *env* gene was then amplified using a 1× PCR buffer consisting of 2 mM MgCl<sub>2</sub>, 0.2 mM of each deoxynucleoside triphosphate, 0.2 μM of each primer, and 0.025 U/μl Platinum *Taq* polymerase (Invitrogen) in a 20-μl reaction. First round PCR was performed with sense primer SIVEnvF1 5'-CCT CCC CCT CCA GGA CTA GC-3' and antisense primer SIVEnvR1 under the following conditions: 1 cycle of 94°C for 2 min, 35 cycles at 94°C for 15 sec, 55°C for 30 sec, and 72°C for 4 min, followed by a final extension of 72°C for 10 min. Nested PCR was performed with primers SIVEnvF2 5'-TAT AAT AGA CAT GGA GAC ACC CTT GAG GGA GC-3' and SIVEnvR2 5'-ATG AGA CAT RTC TAT TGC CAA TTT GTA-3' under the same conditions used for first-round PCR, but for a total of 45 cycles. Correctly sized amplicons were sequenced

directly using inner PCR primers and 6 additional HIV-1 specific primers using Big Dye Terminator technology (Applied Biosystems). To confirm PCR amplification from a single template, chromatograms were manually examined for multiple peaks, indicative of the presence of amplicons resulting from PCR-generated recombination events, *Taq* polymerase errors or multiple variant templates in a single reaction.

To determine the statistical significance of the outcome from animals infected with group 1 viruses the  $\chi^2$  test was used.

The 'winner' Env sequences were derived from samples obtained from (i) subject 1054, a male subject from South Carolina with unknown risk factors, plasma VL 320,000 RNA copies/ml at estimated 2-3 weeks post-infection, and (ii) subject AD081, a male subject from New York, with a history of intramuscular steroid use with shared needles, plasma VL 136,000 RNA copies/ml at estimated 6 weeks post-infection.

### **Flow cytometry**

Absolute cell counts were performed on EDTA-anti-coagulated whole blood described (Del Prete et al., 2012; Hatzioannou et al., 2009; Tabb et al., 2013) using the following surface antigen staining panel: CD45 FITC (DO58-1283), CD3 PE (SP34-2), CD4 APC (L200), CD14 APC-Cy7 (M5E2; BioLegend), CD8 $\alpha$  PE-Cy7 (SK1), and CD20 Pacific Blue (2H7; BioLegend). Lymphocyte immunophenotyping was performed on freshly isolated mononuclear cells using the following antibodies: CD4 Pacific Blue (OKT4; BioLegend), CCR5 PE (3A9), CD28 ECD (CD28.2; Beckman Coulter), CD95 PE-Cy5 (DX2), CD8 PE-Cy7 (SK1), CD38 APC (OK10; NIH Nonhuman Primate Resource), CD3 APC-Cy7 (SP34-2), and Ki67 FITC (B56).
